# Supplementary material for: Analytical probing of membranotropic effects of antimicrobial copper nanoparticles on lipid vesicles as membrane models
Source: Royal Society of Chemistry journal article supplement (doi:10.1039/d3na00608e), 2023-01-01
Supplement: d3na00608e1.pdf [file d3na00608e1.pdf]

## SUPPORTING INFORMATION

### Analytical probing of membranotropic effects of antimicrobial copper nanoparticles on lipid vesicles as membrane models

Margherita Izzi,<sup>†a</sup> Miquel Oliver,<sup>†b</sup> Helena Mateos,<sup>a</sup> Gerardo Palazzo,<sup>a</sup> Nicola Cioffi<sup>\*a</sup> and Manuel Miró<sup>\*b</sup>

<sup>a</sup> Chemistry Department, University of Bari Aldo Moro, Via Orabona, 4, 70126 Bari, Italy.

<sup>b</sup> FI-TRACE Group, Department of Chemistry, University of the Balearic Islands, Carretera de Valldemossa km 7.5, E-07122 Palma de Mallorca, Spain.

<sup>†</sup> These authors contributed equally to this work.

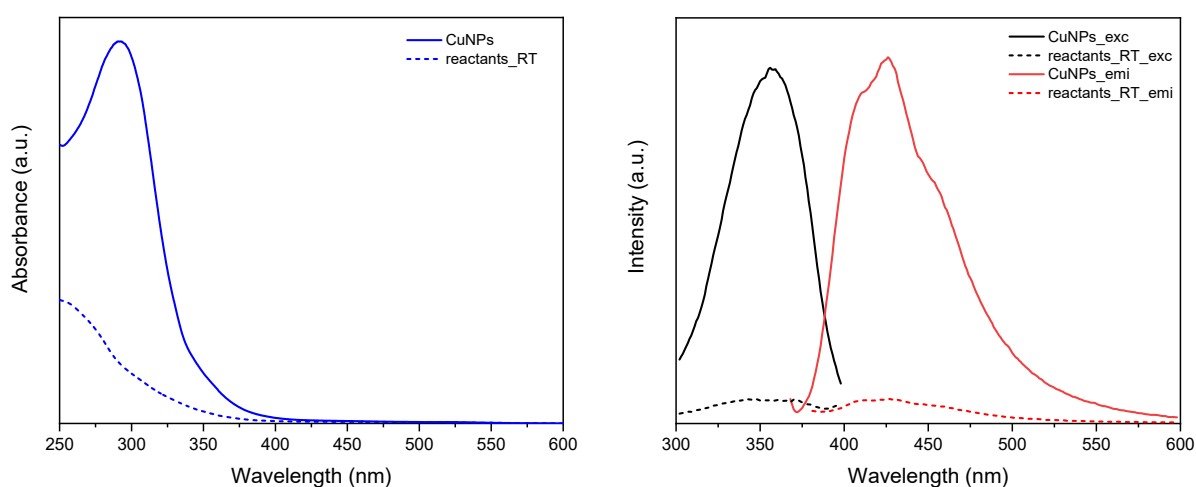

**Figure S1.** UV-Vis (left) and fluorescence spectra (right) of the reactants at room temperature, compared with the CuNPs synthesized at 65°C.

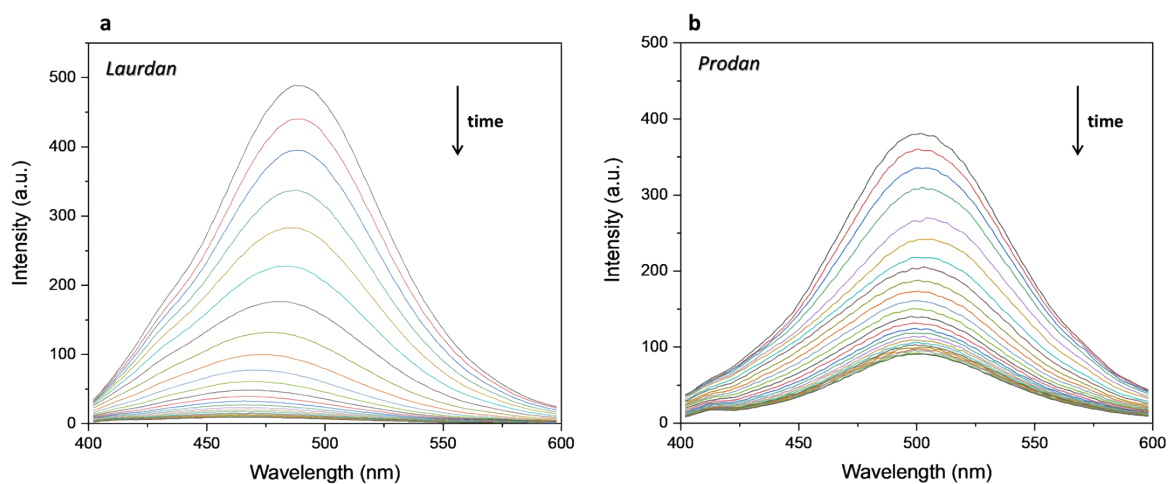

**Figure S2.** Emission spectra of laurdan (a) and prodan (b) over time in a suspension containing 100  $\mu$ M PC and  $10^{11}$  CuNPs/mL. The spectra were acquired under the following conditions: temperature 37°C; excitation 360 nm; emission 400–600 nm; data interval 1 nm; voltage to 540 V; slit widths of 10 nm.

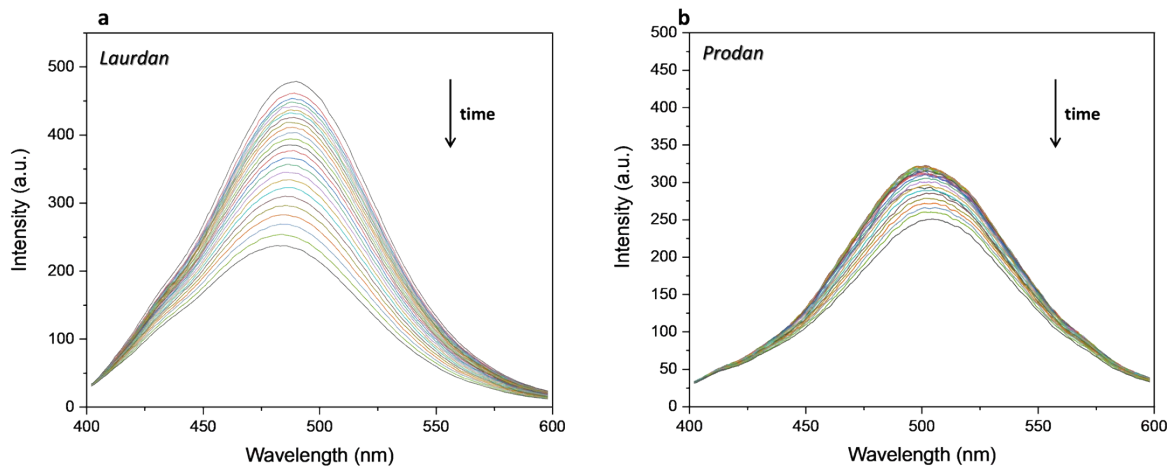

**Figure S3.** Emission spectra of laurdan and prodan over time in a suspension containing 100  $\mu\text{M}$  PC and  $\text{Cu}^{2+}$  ions at the same concentration than that of the synthesis of CuNPs (0,15mM, ultimately resulting in 0.0015 mM, after the usual 1:100 dilution, operated prior the emission measurements). The spectra were acquired under the following conditions: temperature 37°C; excitation 360 nm; emission 400–600 nm; data interval 1 nm; voltage to 540 V; slit widths of 10 nm.

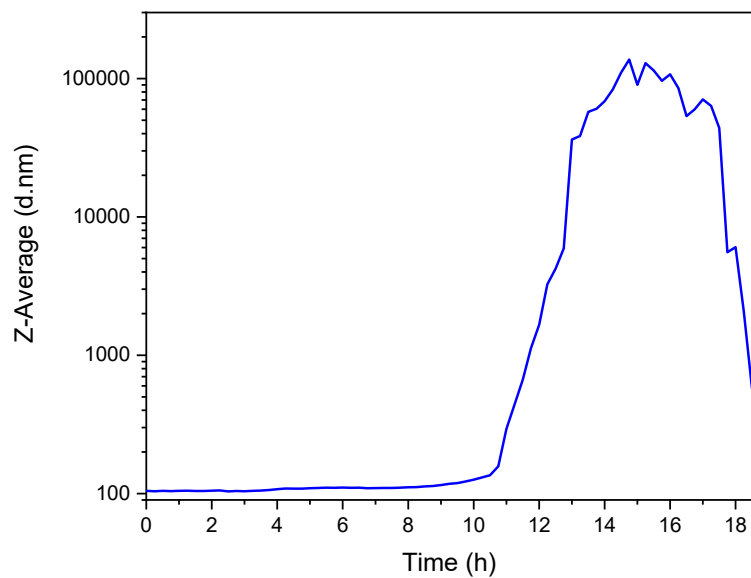

**Figure S4.** Hydrodynamic diameter of liposome over time as measured by DLS.
